# Supplementary material for: Direct haplotype-resolved 5-base HiFi sequencing for genome-wide profiling of hypermethylation outliers in a rare disease cohort
Source: PubMed Central journal article supplement (PMC10226990; doi:10.1038/s41467-023-38782-1), 2023-05-29
Supplement: 41467_2023_38782_MOESM3_ESM.pdf [file 41467_2023_38782_MOESM3_ESM.pdf]

## **Description of Additional Supplementary Files**

**File Name:** Supplementary Data 1

**Description:** Overview of data set

**File Name:** Supplementary Data 2

**Description:** List of coverage of HiFi-GS samples included in the study

**File Name:** Supplementary Data 3

**Description:** Sample-wise correlation data of methylation levels across methods

**File Name:** Supplementary Data 4

**Description:** Characteristics of extreme hyper-mCpG tiles seen in 2 or less unrelated individuals

**File Name:** Supplementary Data 5

**Description:** Number of extreme hyper-mCpG tiles per individual

**File Name:** Supplementary Data 6

**Description:** Characteristics of extreme hyper-mCpG tiles with large z-score

**File Name:** Supplementary Data 7

**Description:** Number of extreme hyper-mCpG tiles with large z score per individual

**File Name:** Supplementary Data 8

**Description:** Characteristics of extreme hyper-mCpG tiles in affected patients only
